# Supplementary material for: Mixture of hydrogen and methane under planetary interior conditions
Source: Royal Society of Chemistry journal article supplement (doi:10.1039/d4cp00058g), 2024-01-01
Supplement: d4cp00058g1.pdf [file d4cp00058g1.pdf]

## Supporting information

### Mixture of Hydrogen and Methane under planetary interior conditions

Argha Jyoti Roy<sup>1\*</sup>, Armin Bergermann<sup>1</sup>, Mandy Bethkenhagen<sup>2</sup>, and Ronald Redmer<sup>1</sup>

<sup>1</sup>*Institut für Physik, Universität Rostock, D-18051 Rostock, Germany*

<sup>2</sup>*LULI, CNRS, CEA, Sorbonne Université, École Polytechnique- Institut Polytechnique de Paris, 91128 Palaiseau, France*

Table 1: DC Electrical conductivity data table of a dense hydrogen-methane mixture as a function of pressure along five isotherms.

| Temperature [K] | Pressure [GPa] | $\rho$ [g/cm <sup>3</sup> ] | $\sigma_0$ [MS/m] |
|-----------------|----------------|-----------------------------|-------------------|
| 1000            | 73.329         | 1.32                        | 7.245e-13         |
| 1000            | 183.56         | 1.85                        | 9.438e-11         |
| 1000            | 555.88         | 2.90                        | 0.18403           |
| 1000            | 820.58         | 3.43                        | 0.89112           |
| 1000            | 978.44         | 3.70                        | 1.3114            |
| 3000            | 18.340         | 0.74                        | 1.55e-05          |
| 3000            | 83.345         | 1.32                        | 0.001652          |
| 3000            | 181.253        | 1.85                        | 0.44612           |
| 3000            | 360.770        | 2.42                        | 0.96726           |
| 3000            | 571.341        | 2.90                        | 1.41040           |
| 3000            | 857.916        | 3.43                        | 1.89140           |
| 3000            | 1023.22        | 3.70                        | 2.08960           |
| 4000            | 20.029         | 0.74                        | 0.0020762         |
| 4000            | 79.360         | 1.32                        | 0.22072           |
| 4000            | 187.621        | 1.85                        | 0.70642           |
| 4000            | 373.578        | 2.42                        | 1.1537            |
| 4000            | 588.299        | 2.90                        | 1.5101            |
| 4000            | 878.583        | 3.43                        | 2.0087            |
| 4000            | 1045.93        | 3.70                        | 2.1885            |
| 6000            | 21.818         | 0.74                        | 0.0937            |
| 6000            | 87.634         | 1.32                        | 0.48127           |
| 6000            | 139.541        | 1.85                        | 0.8759            |
| 6000            | 400.853        | 2.42                        | 1.3064            |
| 6000            | 622.585        | 2.90                        | 1.6207            |
| 6000            | 919.991        | 3.43                        | 1.9678            |
| 6000            | 1090.9         | 3.70                        | 2.1701            |
| 8000            | 26.165         | 0.74                        | 0.173             |
| 8000            | 99.789         | 1.32                        | 0.5657            |
| 8000            | 225.617        | 1.85                        | 0.9328            |
| 8000            | 427.99         | 2.42                        | 1.3204            |
| 8000            | 655.760        | 2.90                        | 1.6239            |
| 8000            | 959.95         | 3.43                        | 1.9382            |
| 8000            | 1134.19        | 3.70                        | 2.1547            |
| 16000           | 51.0504        | 0.74                        | 0.2536            |
| 16000           | 151.645        | 1.32                        | 0.6311            |
| 16000           | 302.54         | 1.85                        | 0.9636            |
| 16000           | 532.03         | 2.42                        | 1.3016            |
| 16000           | 782.378        | 2.90                        | 1.6067            |
| 16000           | 1112.14        | 3.43                        | 1.8874            |
| 16000           | 1297.24        | 3.70                        | 2.0104            |

---

\*corresponding author: [argha.roy@uni-rostock.de](mailto:argha.roy@uni-rostock.de)

Table 2: Electrical conductivity data along the P-T profile of Uranus<sup>1</sup> as a function of radius of the planet.

| <b>Pressure [GPa]</b> | <b>Temperature [K]</b> | <b>r/R<sub>p</sub></b> | <b><math>\sigma_0</math> [MS/m]</b> |
|-----------------------|------------------------|------------------------|-------------------------------------|
| 17.157                | 2445.52                | 0.783                  | 1.123e-06                           |
| 39.40                 | 3000                   | 0.7117                 | 0.007115                            |
| 78.90                 | 3646.30                | 0.6587                 | 0.1473                              |
| 126.78                | 4176.87                | 0.6057                 | 0.4967                              |
| 194.26                | 4758.55                | 0.5377                 | 0.7894                              |
| 279.60                | 5285.71                | 0.4577                 | 1.1097                              |
| 400.853               | 6000                   | 0.3447                 | 1.338                               |
| 499.44                | 6231.78                | 0.2467                 | 1.4953                              |
| 773.66                | 6523.89                | 0.0432                 | 1.8446                              |

**References:**

1. N. Nettelmann, R Helled, J. Fortney and R. Redmer, Planet. Space Sci., 2013, 77, 143-151.
